# Supplementary material for: A Soft Zwitterionic Hydrogel as Potential Coating on a Polyimide Surface to Reduce Foreign Body Reaction to Intraneural Electrodes
Source: MDPI journal article supplement (doi:10.3390/molecules27103126), 2022-05-13
Supplement: s1 [file s1]

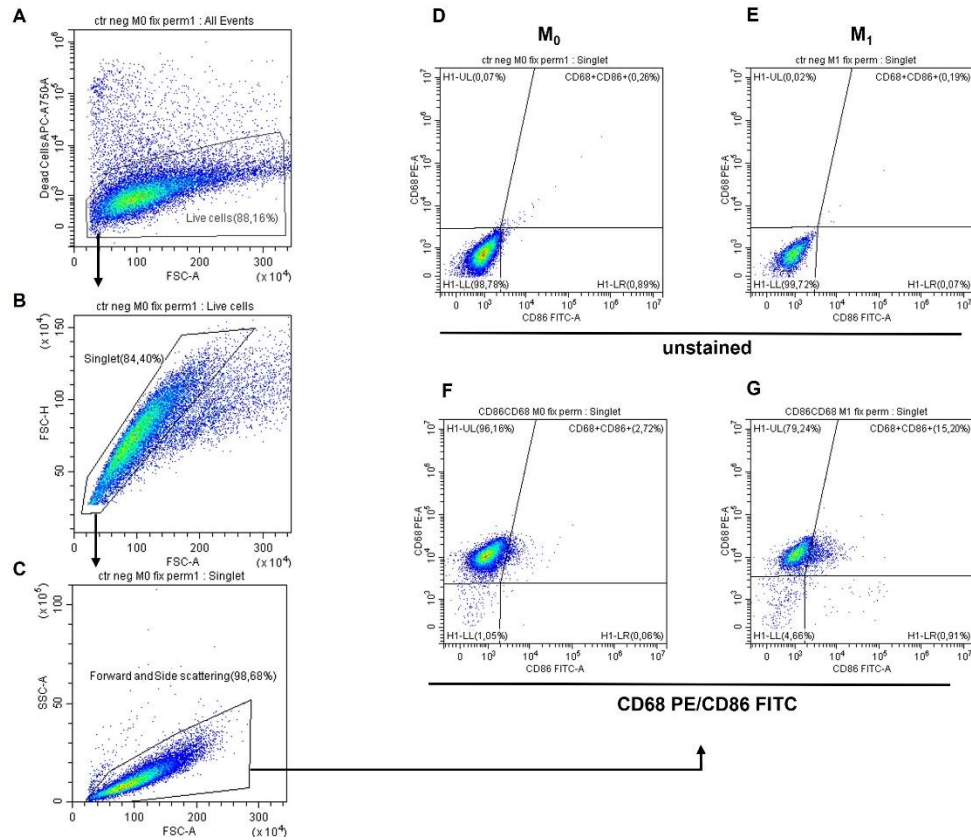

**Figure S1. CD68<sup>+</sup>CD86<sup>low</sup> M<sub>0</sub>-macrophage and CD68<sup>+</sup>CD86<sup>+</sup> M<sub>1</sub>-macrophage phenotypes.** Representative flow cytometry gating of live cells for the M<sub>0</sub> macrophages (negative ctrl) in (A) as well as forward (FSC) and side scatter (SSC) intensity plots to gating Singlet in (B) and morphological analysis in (C). Evaluation of M<sub>0</sub> (left) and M<sub>1</sub> (right) cell phenotypes (D–G) was determined by flow cytometry as percentage for the expression of the pan-macrophage marker CD68 and the specific M<sub>1</sub> marker CD86. We reported the two-color fluorescence dot plots of a representative experiment. The percentage of double positive cells in M<sub>1</sub> (H1-UR quadrant in (G)) shows a 5.6-fold increase compared to M<sub>0</sub> cells (H1-UR quadrant in (F)).
